# Supplementary material for: Higher Dietary Choline and Betaine Intakes Are Associated with Better Body Composition in the Adult Population of Newfoundland, Canada
Source: PLoS One. 2016 May 11;11(5):e0155403. doi: 10.1371/journal.pone.0155403 (PMC4863971; doi:10.1371/journal.pone.0155403)
Supplement: S4 Table — (DOC) [file pone.0155403.s006.doc]

**S4 Table. Partial correlations between dietary choline, betaine intakes (mg/kg/day) and body composition variables for Newfoundland population based on alcohol status.*1***

| Choline (mg/kg/day) | Female | | |  | Male | | |
| --- | --- | --- | --- | --- | --- | --- | --- |
| Non-alcohol (n=569) |  | Alcohol (n=1663) |  | Non-alcohol (n=137) |  | Alcohol  (n=685) |
|  | r’(p)*2* |  | r’(p) *2* |  | r’(p) *2* |  | r’(p) *2* |
| Weight (kg) | -0.511(0.000) |  | -0.464(0.000) |  | -0.363(0.000) |  | -0.306(0.000) |
| BMI (kg/m2) | -0.480(0.000) |  | -0.421(0.000) |  | -0.295(0.000) |  | -0.320(0.000) |
| WC (cm) | -0.502(0.000) |  | -0.429(0.000) |  | -0.270(0.002) |  | -0.341(0.000) |
| WHR | -0.222(0.000) |  | -0.114(0.000) |  | -0.202(0.023) |  | -0.148(0.000) |
| Trunk fat (%) | -0.398(0.000) |  | -0.370(0.000) |  | -0.309(0.000) |  | -0.346(0.000) |
| Android fat (%) | -0.420(0.000) |  | -0.361(0.000) |  | -0.341(0.000) |  | -0.364(0.000) |
| Gynoid fat (%) | -0.313(0.000) |  | -0.316(0.000) |  | -0.277(0.000) |  | -0.304(0.000) |
| Total body fat (%) | -0.403(0.000) |  | -0.382(0.000) |  | -0.302(0.000) |  | -0.346(0.000) |
| Total lean (%) | 0.396(0.000) |  | 0.371(0.000) |  | 0.291(0.000) |  | 0.349(0.000) |
| Betaine (mg/kg/day) | Female | | |  | Male | | |
|  | Non-alcohol (n=569) |  | Alcohol (n=1663) |  | Non-alcohol (n=137) |  | Alcohol  (n=685) |
|  | r’(p) *2* |  | r’(p) *2* |  | r’(p) *2* |  | r’(p) *2* |
| Weight (kg) | -0.269(0.000) |  | -0.234(0.000) |  | -0.189(0.000) |  | -0.208(0.000) |
| BMI (kg/m2) | -0.316(0.000) |  | -0.219(0.000) |  | -0.196(0.028) |  | -0.234(0.000) |
| WC (cm) | -0.295(0.000) |  | -0.221(0.000) |  | -0.127(0.157) |  | -0.231(0.000) |
| WHR | -0.123(0.000) |  | -0.082(0.000) |  | -0.185(0.038) |  | -0.171(0.000) |
| Trunk fat (%) | -0.291(0.000) |  | -0.216(0.000) |  | -0.166(0.064) |  | -0.275(0.000) |
| Android fat (%) | -0.269(0.000) |  | -0.215(0.000) |  | -0.153(0.087) |  | -0.271(0.000) |
| Gynoid fat (%) | -0.194(0.000) |  | -0.154(0.000) |  | -0.117(0.192) |  | -0.158(0.000) |
| Total body fat (%) | -0.291(0.000) |  | -0.210(0.000) |  | -0.185(0.038) |  | -0.252(0.000) |
| Total lean (%) | 0.279(0.000) |  | 0.203(0.000) |  | 0.183(0.041) |  | 0.262(0.000) |

### *1* Partial correlations between dietary choline, betaine intakes (mg/kg/day) and obesity related indexes were controlling for age, total calorie intake, physical activity.

*2* r’: partial correlation coefficient.Statistical significance was set to p<0.05.
